CORRECTION

# Correction: Investigating the case of human nose shape and climate adaptation

**Arslan A. Zaidi, Brooke C. Mattern, Peter Claes, Brian McEvoy, Cris Hughes, Mark D. Shriver**

The fourth author's name is spelled incorrectly. The correct name is: Brian McEvoy. The correct citation is: Zaidi AA, Mattern BC, Claes P, McEvoy B, Hughes C, Shriver MD (2017) Investigating the case of human nose shape and climate adaptation. PLoS Genet 13(3): e1006616. [doi.org/10.1371/journal.pgen.1006616](https://doi.org/10.1371/journal.pgen.1006616)

## Reference

1. Zaidi AA, Mattern BC, Claes P, McEvoy B, Hughes C, Shriver MD (2017) Investigating the case of human nose shape and climate adaptation. PLoS Genet 13(3): e1006616. <https://doi.org/10.1371/journal.pgen.1006616> PMID: 28301464

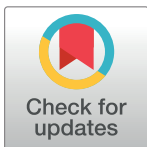

## OPEN ACCESS

**Citation:** Zaidi AA, Mattern BC, Claes P, McEvoy B, Hughes C, Shriver MD (2018) Correction: Investigating the case of human nose shape and climate adaptation. PLoS Genet 14(1): e1007207. <https://doi.org/10.1371/journal.pgen.1007207>

**Published:** January 31, 2018

**Copyright:** © 2018 Zaidi et al. This is an open access article distributed under the terms of the [Creative Commons Attribution License](https://creativecommons.org/licenses/by/4.0/), which permits unrestricted use, distribution, and reproduction in any medium, provided the original author and source are credited.
